# Supplementary material for: Type II-Metacaspases are involved in cell stress but not in cell death in the unicellular green alga Dunaliella tertiolecta
Source: PubMed Central journal article supplement (PMC6859423; doi:10.15698/mic2019.11.696), 2019-10-07
Supplement: mic-06-494-s01.pdf [file mic-06-494-s01.pdf]

## Supplemental material

### Type II-Metacaspases are involved in cell stress but not in cell death in the unicellular green algae *Dunaliella tertiolecta*

M. Teresa Mata<sup>1&</sup>, Armando Palma<sup>1</sup>, Candela García-Gómez<sup>1\*#</sup>, María López-Parages<sup>1</sup>, Víctor Vázquez<sup>1</sup>, Iván Cheng-Sánchez<sup>2</sup>, Francisco Sarabia<sup>2</sup>, Félix López-Figueroa<sup>1</sup>, Carlos Jiménez<sup>1</sup>, María Segovia<sup>1\*</sup>

**Table S1.** Inhibition of Rase and Kase enzymatic activities with reversible and irreversible protease inhibitors presenting different target inhibition sites, at different final concentrations.

| Inhibitor   | Compound                                                       | Target proteoin inhibition       | Type of inhibition |
|-------------|----------------------------------------------------------------|----------------------------------|--------------------|
| PMSF        | Phenylmethylsulfonyl fluoride                                  | Serine-proteases                 | Reversible         |
| Z-VAD-FMK   | Benzyloxycarbonyl-Val-Ala-Asp (OMe) fluoromethylketone         | Caspases                         | Irreversible       |
| 4A-PMSF     | 4-(2-Aminoethyl)benzenesulfonyl fluoride hydrochloride         | Serin-proteases                  | Irreversible       |
| BOC-D-FMK   | Boc-Asp(OMe) fluorometylketone                                 | Caspases                         | Irreversible       |
| E64         | <i>Trans</i> -Epoxy succinyl-L-leucylamido(4-guanidino) butane | Cisteinyl-proteases              | Irreversible       |
| Leupeptin   | Leupeptin                                                      | Serine & cisteinyl-proteases     | Reversible         |
| Benzamidine | Benzamidine                                                    | Poly-ADPribose polymerase (PARP) | Reversible         |

**Table S2.** In-gel-Rase activity bands (zymograms) analyses by MALDI (matrix-assisted laser desorption ionization) source and tandem time-of-flight (TOF/TOF) mass analyses. For protein identification, peptide lists from the MS analysis were submitted to the Mascot search engine version 2.1 (Matrix Science, London, UK) integrated in GPS Explorer™ v3.5 (AB Sciex). A combined (MS+MS/MS) type analysis was run by aligning similar fragments with those sequences uploaded in NCBI nr/Uniprot databases restricted to Viridiplantae as search criteria. For each Rase substrate the 10 most probable matching proteins found are shown. The protein score C.I. % is the confidence interval for the protein scores that the Mascot search engine assigns to each identification. Values above 99% are considered as significant high identity.

| Zymogram | Band/Species | Protein Score C.I.% | Protein name                                                                                               | M.W. (KDa) | Accession number |
|----------|--------------|---------------------|------------------------------------------------------------------------------------------------------------|------------|------------------|
| RVRR     | 1/D.t        | 99.812              | Phytochrome B, partial [ <i>Tarenaya hassleriana</i> ]                                                     | 117.1      | AAW56607.1       |
|          | 1/D.t        | 99.746              | Homeodomain-like superfamily protein [ <i>Arabidopsis thaliana</i> ]                                       | 447.1      | NP_974216.1      |
|          | 1/D.t        | 99.598              | 110 kDa 4SNc-Tudor domain protein [ <i>Pisum sativum</i> ]                                                 | 108.6      | BAC06184.1       |
|          | 1/D.t        | 99.198              | Asparaginyl-tRNA synthetase, partial [ <i>Hyacinthus orientalis</i> ]                                      | 10.0       | AAT08691.1       |
|          | 1/D.t        | 99.058              | Hypothetical protein PHYPA_024096 [ <i>Physcomitrella patens</i> ]                                         | 78.6       | PNR34279.1       |
|          | 1/D.t        | 98.918              | THO complex subunit 4A-like isoform X1 [ <i>Physcomitrella patens</i> ]                                    | 28.9       | XP_024365628.1   |
|          | 1/D.t        | 98.841              | Unknown protein [ <i>Arabidopsis thaliana</i> ]                                                            | 13.9       | AAD23025.2       |
|          | 1/D.t        | 98.541              | CDT1-like protein a, chloroplastic [ <i>Oryza sativa Japonica Group</i> ]                                  | 64.5       | XP_015634451.1   |
|          | 1/D.t        | 97.345              | Hypothetical protein VITISV_010874 [ <i>Vitis vinifera</i> ]                                               | 37.3       | CAN82058.1       |
|          | 1/D.t        | 97.22               | Retrotransposon protein, putative, Ty3-gypsy subclass [ <i>Oryza sativa Japonica Group</i> ]               | 17.3       | ABA96803.1       |
| RVRR     | 2/D.t        | 99.794              | PREDICTED: uncharacterized protein LOC100248586 [ <i>Vitis vinifera</i> ]                                  | 54.4       | XP_002267983.1   |
|          | 2/D.t        | 98.893              | Protein PHOSPHATE STARVATION RESPONSE 3-like [ <i>Physcomitrella patens</i> ]                              | 62.1       | XP_024363632.1   |
|          | 2/D.t        | 98.507              | Micronuclear linker histone polyprotein, putative [ <i>Solanum bulbocastanum</i> ]                         | 17.6       | AAP45160.2       |
|          | 2/D.t        | 98.076              | (-)-limonene synthase [ <i>Picea abies</i> ]                                                               | 73.4       | AAS47694.1       |
|          | 2/D.t        | 96.733              | PREDICTED: protein yippee-like At4g27745 [ <i>Oryza brachyantha</i> ]                                      | 12.7       | XP_006662984.1   |
|          | 2/D.t        | 94.323              | Kinesin-like protein KIN-12F [ <i>Physcomitrella patens</i> ]                                              | 309.8      | XP_024374937.1   |
|          | 2/D.t        | 93.33               | Disease resistance gene analog, partial [ <i>Zizania latifolia</i> ]                                       | 18.6       | ABB69771.1       |
|          | 2/D.t        | 89.429              | Uncharacterized protein LOC4336466 isoform X1 [ <i>Oryza sativa Japonica Group</i> ]                       | 15.1       | XP_015633835.1   |
|          | 2/D.t        | 89.429              | Hypothetical protein VITISV_024824 [ <i>Vitis vinifera</i> ]                                               | 58.3       | CAN61722.1       |
|          | 2/D.t        | 88.139              | Pentatricopeptide repeat-containing protein At4g18520, chloroplastic-like [ <i>Physcomitrella patens</i> ] | 57,5       | XP_024379060.1   |

|             |                      |     |                                                                                                                         |           |                |
|-------------|----------------------|-----|-------------------------------------------------------------------------------------------------------------------------|-----------|----------------|
| <b>RVRR</b> | 3/A.t <sub>oe1</sub> | 100 | Ribulose-1,5-bisphosphate carboxylase/oxygenase large subunit (chloroplast) [ <i>Arabidopsis thaliana</i> ]             | 53.4/53.0 | NP_051067.1    |
|             | 3/A.t <sub>oe1</sub> | 100 | Large subunit of ribulose-1,5-bisphosphate carboxylase/oxygenase (chloroplast) [ <i>Arabis hirsuta</i> ]                | 53.4/53.0 | YP_001123207.1 |
|             | 3/A.t <sub>oe1</sub> | 100 | Ribulose-1,5-bisphosphate carboxylase/oxygenase large subunit (chloroplast) [ <i>Olimarabidopsis pumila</i> ]           | 53.4/53.0 | YP_001123123.1 |
|             | 3/A.t <sub>oe1</sub> | 100 | Ribulosebisphosphate carboxylase, partial [ <i>Arabidopsis thaliana</i> ]                                               | 48.0      | BAA19595.1     |
|             | 3/A.t <sub>oe1</sub> | 100 | Ribulose-1,5-bisphosphate carboxylase/oxygenase large subunit, partial (chloroplast) [ <i>Crucihimalaya himalaica</i> ] | 48.0/47.6 | BAA19596.1     |
|             | 3/A.t <sub>oe1</sub> | 100 | Ribulose-1,5-bisphosphate carboxylase/oxygenase large subunit, partial (chloroplast) [ <i>Polanisia dodecandra</i> ]    | 49.9/49.6 | AAO38787.1     |
|             | 3/A.t <sub>oe1</sub> | 100 | Ribulose-1,5-bisphosphate carboxylase/oxygenase large subunit, partial (chloroplast) [ <i>Heliophila pubescens</i> ]    | 52.0/51.5 | CAJ86804.1     |
|             | 3/A.t <sub>oe1</sub> | 100 | Ribulose-1,5-bisphosphate carboxylase/oxygenase large subunit, partial (chloroplast) [ <i>Tarenaya hassleriana</i> ]    | 52.1/51.6 | AAA84103.2     |
|             | 3/A.t <sub>oe1</sub> | 100 | Ribulose-1,5-bisphosphate carboxylase/oxygenase large subunit, partial (chloroplast) [ <i>Aethionema grandiflorum</i> ] | 49.8/49.4 | AAO38786.1     |
|             | 3/A.t <sub>oe1</sub> | 100 | Ribulose-1,5-bisphosphate carboxylase/oxygenase large subunit, partial (chloroplast) [ <i>Rorippa indica</i> ]          | 48.0/47.6 | BAA19601.1     |
| <b>RVRR</b> | 4/A.t <sub>oe1</sub> | 100 | Glyceraldehyde-3-phosphate dehydrogenase C2 [ <i>Arabidopsis thaliana</i> ]                                             | 36.9      | NP_172801.1    |
|             | 4/A.t <sub>oe1</sub> | 100 | RecName: Full=Glyceraldehyde-3-phosphate dehydrogenase, cytosolic                                                       | 36.9      | P04796.2       |
|             | 4/A.t <sub>oe1</sub> | 100 | Glyceraldehyde-3-phosphate dehydrogenase C subunit (GapC) [ <i>Arabidopsis thaliana</i> ]                               | 37.0      | AAM65189.1     |
|             | 4/A.t <sub>oe1</sub> | 100 | Glyceraldehyde-3-phosphate dehydrogenase C2 [ <i>Arabidopsis thaliana</i> ]                                             | 33.9      | NP_001077530.1 |
|             | 4/A.t <sub>oe1</sub> | 100 | Glyceraldehyde-3-phosphate dehydrogenase, partial [ <i>Pachycladon cheesemanii</i> ]                                    | 14.5      | ABM98111.1     |
|             | 4/A.t <sub>oe1</sub> | 100 | Cytosolic glyceraldehyde-3-phosphate dehydrogenase, partial [ <i>Leavenworthia crassa</i> ]                             | 13.5      | AAC32382.1     |
|             | 4/A.t <sub>oe1</sub> | 100 | Glyceraldehyde-3-phosphate dehydrogenase, partial [ <i>Pachycladon radicum</i> ]                                        | 14.5      | ABM98114.1     |
|             | 4/A.t <sub>oe1</sub> | 100 | Glyceraldehyde-3-phosphate dehydrogenase, partial [ <i>Brassica napus</i> ]                                             | 17.6      | AAZ05899.1     |
|             | 4/A.t <sub>oe1</sub> | 100 | Glyceraldehyde-3-phosphate dehydrogenase, partial [ <i>Brassica rapa subsp. Pekinensis</i> ]                            | 18.5      | AAN05699.1     |
|             | 4/A.t <sub>oe1</sub> | 100 | Glyceraldehyde-3-phosphate dehydrogenase, partial [ <i>Leavenworthia crassa</i> ]                                       | 8.5       | AAC34080.1     |
| <b>RVRR</b> | 5/A.t <sub>oe1</sub> | 100 | Ribulose-1,5-bisphosphate carboxylase/oxygenase large subunit (chloroplast) [ <i>Arabidopsis thaliana</i> ]             | 53.0      | NP_051067.1    |

|            |                      |     |                                                                                                                                     |      |                |
|------------|----------------------|-----|-------------------------------------------------------------------------------------------------------------------------------------|------|----------------|
|            | 5/A.t <sub>oe1</sub> | 100 | Ribulose-1,5-bisphosphate carboxylase/oxygenase large subunit, partial (chloroplast)<br>[ <i>Arabidopsis lyrata subsp. Lyrata</i> ] | 47.5 | AAO19421.1     |
|            | 5/A.t <sub>oe1</sub> | 100 | Ribulose-1,5-bisphosphate carboxylase/oxygenase large subunit, partial (chloroplast)<br>[ <i>Lepidium africanum</i> ]               | 48.4 | CAJ86805.1     |
|            | 5/A.t <sub>oe1</sub> | 100 | Ribulose-1,5-bisphosphate carboxylase/oxygenase large subunit, partial (chloroplast)<br>[ <i>Erysimum capitatum</i> ]               | 49.5 | AAO38783.1     |
|            | 5/A.t <sub>oe1</sub> | 100 | Ribulose-1,5-bisphosphate carboxylase/oxygenase large subunit, partial (chloroplast)<br>[ <i>Aethionema saxatile</i> ]              | 51.6 | AAS88130.1     |
|            | 5/A.t <sub>oe1</sub> | 100 | Large subunit of ribulose-1,5-bisphosphate carboxylase/oxygenase (chloroplast)<br>[ <i>Arabis hirsuta</i> ]                         | 53.0 | YP_001123207.1 |
|            | 5/A.t <sub>oe1</sub> | 100 | Large subunit of ribulose-1,5-bisphosphate carboxylase/oxygenase (chloroplast)<br>[ <i>Draba nemorosa</i> ]                         | 53.0 | YP_001123558.1 |
|            | 5/A.t <sub>oe1</sub> | 100 | Large subunit of ribulose-1,5-bisphosphate carboxylase/oxygenase (chloroplast)<br>[ <i>Aethionema grandiflorum</i> ]                | 53.7 | YP_001123038.1 |
|            | 5/A.t <sub>oe1</sub> | 100 | Ribulose-1,5-bisphosphate carboxylase/oxygenase large subunit, partial (chloroplast)<br>[ <i>Aethionema grandiflorum</i> ]          | 49.4 | AAO38786.1     |
|            | 5/A.t <sub>oe1</sub> | 100 | Ribulose-1,5-bisphosphate carboxylase/oxygenase large subunit, partial (chloroplast)<br>[ <i>Chamira circaeoides</i> ]              | 50.0 | CAJ86803.1     |
| <b>GRR</b> | 6/A.t <sub>oe1</sub> | 100 | Ribulose-1,5-bisphosphate carboxylase/oxygenase large subunit (chloroplast)<br>[ <i>Arabidopsis thaliana</i> ]                      | 53.0 | NP_051067.1    |
|            | 6/A.t <sub>oe1</sub> | 100 | Large subunit of ribulose-1,5-bisphosphate carboxylase/oxygenase (chloroplast)<br>[ <i>Draba nemorosa</i> ]                         | 53.0 | YP_001123558.1 |
|            | 6/A.t <sub>oe1</sub> | 100 | Ribulosebisphosphate carboxylase, partial [ <i>Arabidopsis thaliana</i> ]                                                           | 47.6 | BAA19595.1     |
|            | 6/A.t <sub>oe1</sub> | 100 | Ribulose-1,5-bisphosphate carboxylase/oxygenase large subunit (chloroplast)<br>[ <i>Olimarabidopsis pumila</i> ]                    | 52.9 | YP_001123123.1 |
|            | 6/A.t <sub>oe1</sub> | 100 | Ribulose-1,5-bisphosphate carboxylase/oxygenase large subunit, partial (chloroplast)<br>[ <i>Limnanthes douglasii</i> ]             | 52.1 | AAA84354.2     |
|            | 6/A.t <sub>oe1</sub> | 100 | Ribulose-1,5-bisphosphate carboxylase/oxygenase large subunit, partial (chloroplast)<br>[ <i>Scutellaria alpina</i> ]               | 52.4 | CAA85705.1     |
|            | 6/A.t <sub>oe1</sub> | 100 | Ribulose-1,5-bisphosphate carboxylase/oxygenase large subunit, partial (chloroplast)<br>[ <i>Sebaea sp. Forest 560</i> ]            | 51.6 | CAJ86855.1     |
|            | 6/A.t <sub>oe1</sub> | 100 | Ribulose-1,5-bisphosphate carboxylase/oxygenase large subunit, partial (chloroplast)<br>[ <i>Aethionema saxatile</i> ]              | 51.6 | AAS88130.1     |

|            |                      |     |                                                                                                                      |      |                |
|------------|----------------------|-----|----------------------------------------------------------------------------------------------------------------------|------|----------------|
|            | 6/A.t <sub>oe1</sub> | 100 | Ribulose-1,5-bisphosphate carboxylase/oxygenase large subunit (chloroplast) [ <i>Crucihimalaya wallichii</i> ]       | 53.0 | YP_001123470.1 |
|            | 6/A.t <sub>oe1</sub> | 100 | Large subunit of ribulose-1,5-bisphosphate carboxylase/oxygenase (chloroplast) [ <i>Aethionema cordifolium</i> ]     | 53.3 | YP_001122954.1 |
| <b>GRR</b> | 7/A.t <sub>oe1</sub> | 100 | Glyceraldehyde-3-phosphate dehydrogenase C subunit 1 [ <i>Arabidopsis thaliana</i> ]                                 | 36.9 | NP_187062.1    |
|            | 7/A.t <sub>oe1</sub> | 100 | Glyceraldehyde-3-phosphate dehydrogenase C2 [ <i>Arabidopsis thaliana</i> ]                                          | 33.9 | NP_001077530.1 |
|            | 7/A.t <sub>oe1</sub> | 100 | Recname: Full=Glyceraldehyde-3-phosphate dehydrogenase; Short=GAPDH                                                  | 39.1 | P34783.1       |
|            | 7/A.t <sub>oe1</sub> | 100 | Putative glyceraldehyde-3-phosphate dehydrogenase [ <i>Arabidopsis thaliana</i> ]                                    | 17.3 | BAD94800.1     |
|            | 7/A.t <sub>oe1</sub> | 100 | Putative cytosolic fructose-bisphosphate aldolase, partial [ <i>Populus x canadensis</i> ]                           | 8.8  | ABD35813.1     |
|            | 7/A.t <sub>oe1</sub> | 100 | Glyceraldehyde-3-phosphate dehydrogenase C subunit, partial [ <i>Arabidopsis thaliana</i> ]                          | 8.7  | BAD94315.1     |
|            | 7/A.t <sub>oe1</sub> | 100 | Recname: Full=Glyceraldehyde-3-phosphate dehydrogenase, cytosolic                                                    | 36.9 | P04796.2       |
|            | 7/A.t <sub>oe1</sub> | 100 | Aldolase superfamily protein [ <i>Arabidopsis thaliana</i> ]                                                         | 38.4 | NP_181187.1    |
|            | 7/A.t <sub>oe1</sub> | 100 | Aldolase superfamily protein [ <i>Arabidopsis thaliana</i> ]                                                         | 28.7 | NP_001118453.1 |
|            | 7/A.t <sub>oe1</sub> | 100 | Glyceraldehyde-3-phosphate dehydrogenase C subunit (gapc) [ <i>Arabidopsis thaliana</i> ]                            | 37.0 | AAM65189.1     |
| <b>GRR</b> | 8/A.t <sub>oe1</sub> | 100 | Ribulose-1,5-bisphosphate carboxylase/oxygenase large subunit (chloroplast) [ <i>Arabidopsis thaliana</i> ]          | 53.0 | NP_051067.1    |
|            | 8/A.t <sub>oe1</sub> | 100 | Ribulose-1,5-bisphosphate carboxylase/oxygenase large subunit, partial (chloroplast) [ <i>Aethionema saxatile</i> ]  | 51.6 | AAS88130.1     |
|            | 8/A.t <sub>oe1</sub> | 100 | Ribulose-1,5-bisphosphate carboxylase/oxygenase large subunit (chloroplast) [ <i>Capsella bursa-pastoris</i> ]       | 53.0 | YP_001123381.1 |
|            | 8/A.t <sub>oe1</sub> | 100 | Large subunit of ribulose-1,5-bisphosphate carboxylase/oxygenase (chloroplast) [ <i>Draba nemorosa</i> ]             | 53.0 | YP_001123558.1 |
|            | 8/A.t <sub>oe1</sub> | 100 | Ribulose-1,5-bisphosphate carboxylase/oxygenase large subunit (chloroplast) [ <i>Crucihimalaya wallichii</i> ]       | 53.0 | YP_001123470.1 |
|            | 8/A.t <sub>oe1</sub> | 100 | Large subunit of ribulose-1,5-bisphosphate carboxylase/oxygenase (chloroplast) [ <i>Aethionema cordifolium</i> ]     | 53.3 | YP_001122954.1 |
|            | 8/A.t <sub>oe1</sub> | 100 | Large subunit of ribulose-1,5-bisphosphate carboxylase/oxygenase (chloroplast) [ <i>Aethionema grandiflorum</i> ]    | 53.7 | YP_001123038.1 |
|            | 8/A.t <sub>oe1</sub> | 100 | Ribulose-1,5-bisphosphate carboxylase/oxygenase large subunit, partial (chloroplast) [ <i>Chamira circaeoides</i> ]  | 50.0 | CAJ86803.1     |
|            | 8/A.t <sub>oe1</sub> | 100 | Ribulose-1,5-bisphosphate carboxylase/oxygenase large subunit, partial (chloroplast) [ <i>Heliophila pubescens</i> ] | 51.5 | CAJ86804.1     |

|            |                       |        |                                                                                                                         |       |                |
|------------|-----------------------|--------|-------------------------------------------------------------------------------------------------------------------------|-------|----------------|
|            | 8/A.t <sub>oe1</sub>  | 100    | Ribulose-1,5-bisphosphate carboxylase/oxygenase large subunit (chloroplast) [ <i>Olimarabidopsis pumila</i> ]           | 53.0  | YP_001123123.1 |
| <b>QRR</b> | 9/D.t                 | 100    | Large subunit of ribulose-1,5-bisphosphate carboxylase/oxygenase (chloroplast) [ <i>Aethionema arabicum</i> ]           | 53,4  | YP_009356788.1 |
|            | 9/D.t                 | 100    | Large subunit of ribulose-1,5-bisphosphate carboxylase/oxygenase [ <i>Arabis hirsuta</i> ]                              | 52.9  | YP_001123207.1 |
|            | 9/D.t                 | 100    | Ribulose-1,5-bisphosphate carboxylase/oxygenase large subunit (chloroplast) [ <i>Capsella bursa-pastoris</i> ]          | 53,0  | YP_001123381.1 |
|            | 9/D.t                 | 100    | Large subunit of ribulose-1,5-bisphosphate carboxylase/oxygenase (chloroplast) [ <i>Aethionema grandiflorum</i> ]       | 53.7  | YP_001123038.1 |
|            | 9/D.t                 | 100    | Large subunit of ribulose-1,5-bisphosphate carboxylase/oxygenase (chloroplast) [ <i>Draba nemorosa</i> ]                | 52.9  | YP_001123558.1 |
|            | 9/D.t                 | 100    | Ribulose-1,5-bisphosphate carboxylase/oxygenase large subunit, partial (chloroplast) [ <i>Arabidopsis thaliana</i> ]    | 51.9  | AMR44347.1     |
|            | 9/D.t                 | 100    | Ribulose-1,5-bisphosphate carboxylase/oxygenase large subunit, partial (chloroplast) [ <i>Crucihimalaya himalaica</i> ] | 47.6  | BAA19596.1     |
|            | 9/D.t                 | 100    | Ribulose-1,5-bisphosphate carboxylase/oxygenase large subunit, partial (chloroplast) [ <i>Rorippa indica</i> ]          | 47.6  | BAA19601.1     |
|            | 9/D.t                 | 100    | Ribulose-1,5-bisphosphate carboxylase/oxygenase large subunit, partial (chloroplast) [ <i>Lepidium africanum</i> ]      | 69.6  | CAJ86805.1     |
|            | 9/D.t                 | 100    | Ribulosebisphosphate carboxylase, partial (chloroplast) [ <i>Armoracia rusticana</i> ]                                  | 49.5  | AAB71403.1     |
| <b>QRR</b> | 10/D.t                | 99.363 | PREDICTED: dexh-box ATP-dependent RNA helicase dexh10 isoform X1 [ <i>Vitis vinifera</i> ]                              | 112.6 | XP_002266524.2 |
|            | 10/D.t                | 99.252 | Hypothetical protein VITISV_035836 [ <i>Vitis vinifera</i> ]                                                            | 101.8 | CAN80939.1     |
|            | 10/D.t                | 97.986 | THO complex subunit 2-like isoform X1 [ <i>Physcomitrella patens</i> ]                                                  | 191.7 | XP_024388620.1 |
|            | 10/D.t                | 97.464 | Unknown [ <i>Picea sitchensis</i> ]                                                                                     | 19.4  | ABK26501.1     |
|            | 10/D.t                | 97.345 | Unnamed protein product [ <i>Arabidopsis thaliana</i> ]                                                                 | 26.0  | BAB11390.1     |
|            | 10/D.t                | 96.808 | Putative transcription factor, partial [ <i>Platanus x hispanica</i> ]                                                  | 21.8  | CAL25350.1     |
|            | 10/D.t                | 96.162 | DEAD-box ATP-dependent RNA helicase 39 isoform X1 [ <i>Oryza sativa Japonica Group</i> ]                                | 68.2  | XP_015613578.1 |
|            | 10/D.t                | 95.056 | Hypothetical protein VITISV_040528 [ <i>Vitis vinifera</i> ]                                                            | 48.5  | CAN78754.1     |
|            | 10/D.t                | 94.94  | Hypothetical protein PHYPA_012615, partial [ <i>Physcomitrella patens</i> ]                                             | 107.9 | PNR48141.1     |
|            | 10/D.t                | 94.94  | Hypothetical protein VITISV_031913 [ <i>Vitis vinifera</i> ]                                                            | 190.1 | CAN71787.1     |
| <b>QRR</b> | 11/A.t <sub>oe1</sub> | 100    | Ribulose-1,5-bisphosphate carboxylase/oxygenase large subunit (chloroplast) [ <i>Arabidopsis thaliana</i> ]             | 53.0  | NP_051067.1    |

|            |                       |     |                                                                                                                         |      |                |
|------------|-----------------------|-----|-------------------------------------------------------------------------------------------------------------------------|------|----------------|
|            | 11/A.t <sub>oe1</sub> | 100 | Large subunit of ribulose-1,5-bisphosphate carboxylase/oxygenase (chloroplast)<br>[ <i>Draba nemorosa</i> ]             | 53.0 | YP_001123558.1 |
|            | 11/A.t <sub>oe1</sub> | 100 | Ribulose-1,5-bisphosphate carboxylase/oxygenase large subunit, partial (chloroplast)<br>[ <i>Aethionema saxatile</i> ]  | 51.6 | AAS88130.1     |
|            | 11/A.t <sub>oe1</sub> | 100 | Large subunit of ribulose-1,5-bisphosphate carboxylase/oxygenase (chloroplast)<br>[ <i>Arabis hirsuta</i> ]             | 53.0 | YP_001123207.1 |
|            | 11/A.t <sub>oe1</sub> | 100 | Ribulose-1,5-bisphosphate carboxylase/oxygenase large subunit (chloroplast)<br>[ <i>Capsella bursa-pastoris</i> ]       | 53.0 | YP_001123381.1 |
|            | 11/A.t <sub>oe1</sub> | 100 | Large subunit of ribulose-1,5-bisphosphate carboxylase/oxygenase (chloroplast)<br>[ <i>Aethionema cordifolium</i> ]     | 53.3 | YP_001122954.1 |
|            | 11/A.t <sub>oe1</sub> | 100 | Large subunit of ribulose-1,5-bisphosphate carboxylase/oxygenase (chloroplast)<br>[ <i>Aethionema grandiflorum</i> ]    | 53.7 | YP_001123038.1 |
|            | 11/A.t <sub>oe1</sub> | 100 | Ribulosebisphosphate carboxylase, partial [ <i>Arabidopsis thaliana</i> ]                                               | 47.6 | BAA19595.1     |
|            | 11/A.t <sub>oe1</sub> | 100 | Ribulose-1,5-bisphosphate carboxylase/oxygenase large subunit, partial (chloroplast)<br>[ <i>Arabis stelleri</i> ]      | 47.6 | BAA19597.1     |
|            | 11/A.t <sub>oe1</sub> | 100 | Ribulose-1,5-bisphosphate carboxylase/oxygenase large subunit, partial (chloroplast)<br>[ <i>Rorippa indica</i> ]       | 47.6 | BAA19601.1     |
| <b>QRR</b> | 12/A.t <sub>oe1</sub> | 100 | Ribulose-1,5-bisphosphate carboxylase/oxygenase large subunit (chloroplast)<br>[ <i>Arabidopsis thaliana</i> ]          | 53.0 | NP_051067.1    |
|            | 12/A.t <sub>oe1</sub> | 100 | Ribulose-1,5-bisphosphate carboxylase/oxygenase large subunit, partial (chloroplast)<br>[ <i>Aethionema saxatile</i> ]  | 51.6 | AAS88130.1     |
|            | 12/A.t <sub>oe1</sub> | 100 | Ribulose-1,5-bisphosphate carboxylase/oxygenase large subunit (chloroplast)<br>[ <i>Olimarabidopsis pumila</i> ]        | 53.0 | YP_001123123.1 |
|            | 12/A.t <sub>oe1</sub> | 100 | Ribulose-1,5-bisphosphate carboxylase/oxygenase large subunit (chloroplast)<br>[ <i>Crucihimalaya wallichii</i> ]       | 53.0 | YP_001123470.1 |
|            | 12/A.t <sub>oe1</sub> | 100 | Large subunit of ribulose-1,5-bisphosphate carboxylase/oxygenase (chloroplast)<br>[ <i>Aethionema grandiflorum</i> ]    | 53.7 | YP_001123038.1 |
|            | 12/A.t <sub>oe1</sub> | 100 | Ribulose-1,5-bisphosphate carboxylase/oxygenase large subunit, partial (chloroplast)<br>[ <i>Arabis stelleri</i> ]      | 47.6 | BAA19597.1     |
|            | 12/A.t <sub>oe1</sub> | 100 | Ribulosebisphosphate carboxylase, partial [ <i>Arabidopsis thaliana</i> ]                                               | 47.6 | BAA19595.1     |
|            | 12/A.t <sub>oe1</sub> | 100 | Ribulose-1,5-bisphosphate carboxylase/oxygenase large subunit, partial (chloroplast)<br>[ <i>Polanisia dodecandra</i> ] | 49.6 | AAO38787.1     |
|            | 12/A.t <sub>oe1</sub> | 100 | Ribulose-1,5-bisphosphate carboxylase/oxygenase large subunit, partial (chloroplast)<br>[ <i>Chamira circaeoides</i> ]  | 50.0 | CAJ86803.1     |

|            |                       |     |                                                                                                                         |      |                |
|------------|-----------------------|-----|-------------------------------------------------------------------------------------------------------------------------|------|----------------|
|            | 12/A.t <sub>oe1</sub> | 100 | Ribulose-1,5-bisphosphate carboxylase/oxygenase large subunit, partial (chloroplast)<br>[ <i>Heliophila pubescens</i> ] | 51.5 | CAJ86804.1     |
| <b>QRR</b> | 13/A.t <sub>wt</sub>  | 100 | Ribulose-1,5-bisphosphate carboxylase/oxygenase large subunit (chloroplast)<br>[ <i>Arabidopsis thaliana</i> ]          | 53.0 | NP_051067.1    |
|            | 13/A.t <sub>wt</sub>  | 100 | Ribulose-1,5-bisphosphate carboxylase/oxygenase large subunit (chloroplast)<br>[ <i>Capsella bursa-pastoris</i> ]       | 53.0 | YP_001123381.1 |
|            | 13/A.t <sub>wt</sub>  | 100 | Ribulose-1,5-bisphosphate carboxylase/oxygenase large subunit (chloroplast)<br>[ <i>Crucihimalaya wallichii</i> ]       | 53.0 | YP_001123470.1 |
|            | 13/A.t <sub>wt</sub>  | 100 | Large subunit of ribulose-1,5-bisphosphate carboxylase/oxygenase (chloroplast)<br>[ <i>Draba nemorosa</i> ]             | 53.0 | YP_001123558.1 |
|            | 13/A.t <sub>wt</sub>  | 100 | Large subunit of ribulose-1,5-bisphosphate carboxylase/oxygenase (chloroplast)<br>[ <i>Aethionema cordifolium</i> ]     | 53.3 | YP_001122954.1 |
|            | 13/A.t <sub>wt</sub>  | 100 | Large subunit of ribulose-1,5-bisphosphate carboxylase/oxygenase (chloroplast)<br>[ <i>Aethionema grandiflorum</i> ]    | 53.7 | YP_001123038.1 |
|            | 13/A.t <sub>wt</sub>  | 100 | Ribulose-1,5-bisphosphate carboxylase/oxygenase large subunit, partial (chloroplast)<br>[ <i>Aethionema saxatile</i> ]  | 51.6 | AAS88130.1     |
|            | 13/A.t <sub>wt</sub>  | 100 | Ribulose-1,5-bisphosphate carboxylase/oxygenase large subunit (chloroplast)<br>[ <i>Olimarabidopsis pumila</i> ]        | 53.0 | YP_001123123.1 |
|            | 13/A.t <sub>wt</sub>  | 100 | Large subunit of ribulose-1,5-bisphosphate carboxylase/oxygenase (chloroplast)<br>[ <i>Arabis hirsuta</i> ]             | 53.0 | YP_001123207.1 |
|            | 13/A.t <sub>wt</sub>  | 100 | Ribulosebisphosphate carboxylase, partial [ <i>Arabidopsis thaliana</i> ]                                               | 47.6 | BAA19595.1     |



**Figure S1.** Clustal Omega (v1.2.4, EMBL-EBI) multiple sequence alignment of Type II metacaspases from *Arabidopsis thaliana* and *Dunaliella salina* showing the conserved catalytic amino acid residues HYS<sup>G</sup>HGT and CHSG of the catalytic diad.

```

Dusal.0158s00011.1      -----MGRSALLIGCNYPGTKAALQGCVNDVWDFKQTLMECMGFDEDNIAIMVDTDQE
AMC9sp|Q9FYE1|1-325    MDQQGMVKRRLAVLVGCNYPNTRNELHGCINDVLAMKETILSRFGFKQDDIEVLTDEPES
AMC8sp|Q9SA41|1-381    -----MAKKALLIGINYPGTAVELRGCVNDVHRMQKCLIELYGFANKDIVIMIDTDKS
AMC7sp|Q6XPT5|1-403    -----MAKRALLIGINYPGTTEELQGCVNDVHRMHKCLVDRFGFAEEDITVLIIDTDES
AMC4sp|O64517|1-418    -----MTKKAVLIGINYPGTKAELRGCVNDVRRMYKCLVERYGFSEENITVLIIDTDES
AMC6sp|O64519|1-368    -----MAKKALLIGINYPGTKAELRGCVNDVRRMRISLVERYGFSEENIKMLIDTDSS
AMC5sp|O64518|1-410    -----MAKKAVLIGINYPGTKAELRGCVNDVRRVHKSIVDRFGFSEENITELIIDTDES
                        :*:*:* * * . * *:*:*:* * . :. * * : * : * ..

Dusal.0158s00011.1      YPQPTGKNIRAYLNKMVDEA--EDGDLLFLHYSGHGTQLPTDDP--EEDPGKNECICPSD
AMC9sp|Q9FYE1|1-325    KVKPTGANIKAALRRMVDKAQAGSGDILFFHYSGHGTRIPSVKS--AHPFKQDEAIVPCD
AMC8sp|Q9SA41|1-381    CIQPTGKNICDELNDLIASG--QSDFLVFHYSGHGTRIPPGIEDSEPTGFDECITPCD
AMC7sp|Q6XPT5|1-403    YTQPTGKNIRQALSELIKPA--KSDVLFVHYSGHGTRVPPETG--EEDDTGFDECIVPSD
AMC4sp|O64517|1-418    STQPTGKNIRRALDLVESA--DSDVLVVHYSGHGTRLPAETG--EDDDTGFDECIVPCD
AMC6sp|O64519|1-368    SIKPTGKNIRQALLDLVEPA--KSDVLFVHYSGHGTRLPAETG--EDDDTGFDECIVPSD
AMC5sp|O64518|1-410    STKPTGKNIRALLNLVESA--KPDVLVVHYSGHGTRLPAETG--EDDDTGFDECIVPCD
                        :*** * * * * : : . * * . * . * . * . * : * * * *

Dusal.0158s00011.1      LDVISDNDLTKIFAPLSKKNVLTFVADCCHSGTLLDHKEVIITGPKDNKRPPQAN--A
AMC9sp|Q9FYE1|1-325    FNLITDVFRELNVNQL-PKGTSFTMISDSCHSGGLIDKEKEQIGPSSVSSNISF-----
AMC8sp|Q9SA41|1-381    MNLIKDQQFREMVS RV-KEGCQLTISDSCHSGGLIQEVKEQIGESHMKPVDKVKEQIEE
AMC7sp|Q6XPT5|1-403    LNPIDDDFRDLVEQV-PEGCQITIVSDSCHSGGLIDEAKEQIGESTTKPNRESKVV--
AMC4sp|O64517|1-418    MNLITDDDFRDLVDKV-PPGCRMTISDSCHSGGLIDEAKEQIGESTKKEAEDEDES---
AMC6sp|O64519|1-368    MNLITDDDFRDLVDMV-PKDCPTIISDSCHSGGLIDEAKEQIGESTKKKK-----
AMC5sp|O64518|1-410    MNLITDDEFRDLVEKV-PKEAHTIISDSCHSGGLIDEAKEQIGESTKKKPKKE-----
                        : : * * : : . : . : * : : * . * . * . * : : . : *

Dusal.0158s00011.1      RSME-----A-----LQAALGAGDDSRDIQIR
AMC9sp|Q9FYE1|1-325    -----AIETTNKTIISR
AMC8sp|Q9SA41|1-381    SHMKQPKLGIASYFLNIVMNLATCGVSKSQR--DRGGGEESFRGEIELEKDETLDIKTR
AMC7sp|Q6XPT5|1-403    ---SSFEEFKNCLHSIFVKLLAFCGIGSSH-----VETREIVEVGEDEVVRSR
AMC4sp|O64517|1-418    -ESSSRFGFRKFLRSKVEGAIESRFGFHIGGNKKDEAEIEETKEIELEDGETIHAKDK
AMC6sp|O64519|1-368    -SGDSSSTIN-----KETEAEIIEVGNR
AMC5sp|O64518|1-410    -SGGSSGLGIKGFVREAVEEALESKGIAPHHKDEK---DENKTKELKLEDGAKVHVVNK
                        :

Dusal.0158s00011.1      SLPLEVYKELLSGKLG--VDFGDLVPSLIKFGDESMEERWARLFPVIADLQKRGQDTSK
AMC9sp|Q9FYE1|1-325    ALPFFKAVLDHLSSTLTGIT---SDIGTHLLELFGRDAGLKFRLPAMDMLDLE-----
AMC8sp|Q9SA41|1-381    YLPFESYLSLLKEQTGTNIEPVRIQTLKLFGEDEPSNQRGLSDLG-----N-----
AMC7sp|Q6XPT5|1-403    YLPLERFIELLKQQTGDNDIEIGKIRPTLFDVFGEDSSPKIKKFMKVIILTKLRKTND---
AMC4sp|O64517|1-418    SLPLQTLIDILKQQTGNDNIEVGIKIRPSLFDFAFGDDSSPKVKKFMKVIILGKLQAGNG---
AMC6sp|O64519|1-368    SLPLETLIDMLKQETGNDNIEVGIKIRPTLFDVFGDDSSPKVKKFMNVIILSNLQETTTTIQ
AMC5sp|O64518|1-410    SLPLQTLIDILKQNTGNDNIEVGIKIRPTLFDVFGEDASPKVKKFMKVIILTKLQEGKT---
                        ** : : . * . * :

Dusal.0158s00011.1      T-----LNTLRESA-----ETLVGL-KKAREPLNENVG
AMC9sp|Q9FYE1|1-325    -----TMTAREKHVDSG
AMC8sp|Q9SA41|1-381    -----CEVDAGDSGASRLNAVTDNG
AMC7sp|Q6XPT5|1-403    --QSTLLGKIEESARGYIEETLND-EHYMKPAMQAQVKS DREIYGG--RSSNG-LFPDRG
AMC4sp|O64517|1-418    -EEGGLMGMLGKLASGFLEGLKLN-EDYVKPAMQTHVGSKEEVYAG--GSRGSVPLPDSG
AMC6sp|O64519|1-368    TVSDEVLGSVENLAQEFLEQKLSDDVK---P-----AIQDVYAG--AINGA--LPDNG
AMC5sp|O64518|1-410    --EGGILGMIGKLAQEFLEKHLNDD EYVKPAMKTHVGNKQEVYAG--ASNGS--LADNG

Dusal.0158s00011.1      ILLSGCLERECADVRK--NSVPHGAFSHAVNMLLRQM HKDGI IATNRSVNLGVRESLS
AMC9sp|Q9FYE1|1-325    ILLSGCQADETSADVGVG--NGKAYGAFSNAIQRVLNEN---EGAMKKNQVMMARDVLE
AMC8sp|Q9SA41|1-381    ILLSGCQTDQRSSEVYVT-RTGKAYGAFSDAIQMILSAPRKDKKIKITNKELVSEARVFLK
AMC7sp|Q6XPT5|1-403    ILLSGCQTDETSADVKKKG---EAFGAFSNAIQMVLSSET-DHKDKITNKEMVLRAREILK
AMC4sp|O64517|1-418    ILLSGCQTDQTSADATPAGKPTEAYGAMSNSIQTIIEET-D--GEISNREMVRTRARKALK
AMC6sp|O64519|1-368    ILLSGCQTDQTSADASPPGHPPELAYGALTNAIQIIIGET-K--GKISNKDLVLKARKLLR
AMC5sp|O64518|1-410    ILLSGCQTDQTSADASPPQHPEMAYGAFNAVQIIIEET-K--GMITYKELVLKARKLLK

Dusal.0158s00011.1      KSGLKQSPCLEGSEKWAADFVLCDEEGSI*
AMC9sp|Q9FYE1|1-325    RLG FHQHPCLYCSDQNADATFLSQP-----
AMC8sp|Q9SA41|1-381    KRGSQRPGLYCHDRFVDPKPFICY-----
AMC7sp|Q6XPT5|1-403    KQMF IQRPGLYCNDREVNAPFIC-----
AMC4sp|O64517|1-418    KQGF TQQPGLYCHDGYANAPFIC-----
AMC6sp|O64519|1-368    KQGF DQRPGLYCNDAYVNARFIC-----
AMC5sp|O64518|1-410    KQGF SQRPGLYCSDSFVNAPFIC-----

```
